# Supplementary material
Source: Springer Nature journal article supplement (https://www.springermedizin.de/resource/supplementary/12967_2009_415_MOESM4_ESM.pdf/9576202)
Supplement: MOESM4 [file 9576202]

**A****Survival distribution**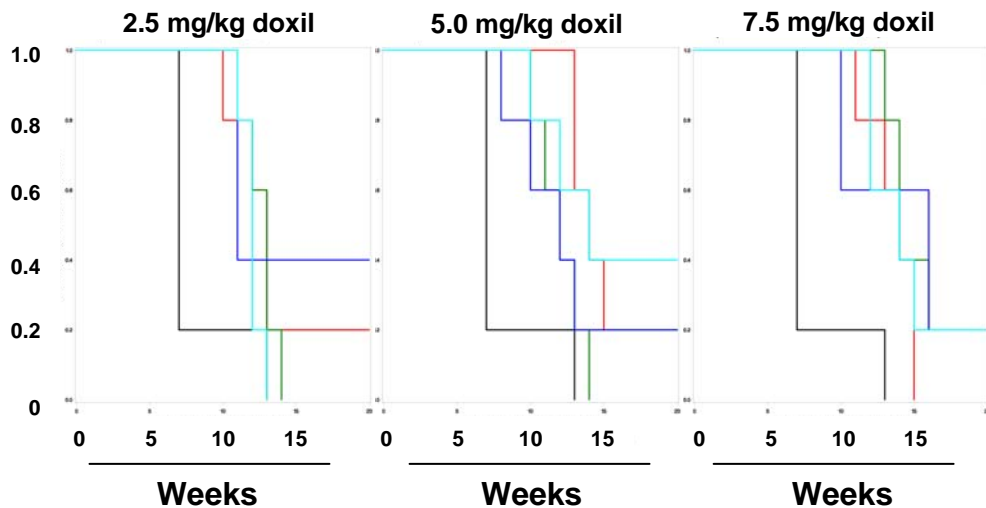**B**

**Hazard Ratios and 95% Confidence Intervals for  
Combination Doses compared to Control**

| Doxil Dose<br>(mg/kg) | IL18 Dose (ug)      |                     |                     |                     |
|-----------------------|---------------------|---------------------|---------------------|---------------------|
|                       | 0                   | 10                  | 30                  | 100                 |
| 2.5                   | 0.19<br>(0.05-0.73) | 0.28<br>(0.08-0.97) | 0.40<br>(0.11-1.39) | 0.13<br>(0.03-0.57) |
| 5.0                   | 0.13<br>(0.03-0.49) | 0.34<br>(0.10-1.19) | 0.11<br>(0.02-0.46) | 0.24<br>(0.06-0.90) |
| 7.5                   | 0.18<br>(0.05-0.66) | 0.11<br>(0.03-0.44) | 0.14<br>(0.04-0.55) | 0.13<br>(0.03-0.53) |
